# Supplementary material
Source: publisher figshare collection journal article supplement (https://diabetesjournals.figshare.com/ndownloader/files/28917231)
Supplement: Supplementary file 1 [file 28917231]

## Sheet: Sheet1
Table S3. Clinical characteristics of subjects used for quantification of AGPAT9 protein levels.
Adipose tissue from five T2D and ten control subjects were obtained from the Nordic Network for Islet Transplantation at Uppsala University, Sweden, through the Human Tissue Laboratory at the Lund University Diabetes Centre.
Adipose tissue from three T2D and three control subjects were obtained from Steno Diabetes Center, Denmark.
	non-diabetics	T2D
N (male/female)	13 (13/0)	8 (8/0)
Age (years)	62.7 ± 8.8	63.8 ± 10.3
BMI (kg/m2)	28.1 ± 4.7	29.2 ± 4.0
HbA1c (mmol/mol)	47.3 ± 7.8	60.7 ± 10.1*
Data are shown as the mean ± SD.
*P < 0.05 , T2D vs. non-diabetic subjects.
